# Supplementary material for: クロスメディア・パッセージ検索 : テロップやCGフリツプ文字列を検索質問とした発話文書に対する検索方式 ( 画像の認識・理解論文特集)
Source: Royal Society of Chemistry journal article supplement (doi:10.1039/d3ay02038j), 2001-08-01
Supplement: d3ay02038j1.pdf [file d3ay02038j1.pdf]

## **Electrochemical sensor for the determination of environmentally hazardous fungicide pyrimethanil in water and fruit samples**

Chou-Yi Hsu <sup>a,\*</sup>, Tariq J. Al-Musawi <sup>b</sup>, Rahim Lataef <sup>c</sup>, Holya A. Lafta <sup>d</sup>, Dalal Abdullah Fatthi<sup>e</sup>, Ahmed S. Abed <sup>f</sup>, Salema K. Hadrawi <sup>g,\*</sup>, Maysm Barzan Talb <sup>h</sup>, Irfan Ahmad <sup>i</sup>, Safia Obaidur Rab <sup>i</sup>, Mohammad Y. Alshahrani <sup>i</sup>

<sup>a</sup> *Department of Pharmacy, Chia Nan University of Pharmacy and Science, Tainan City 71710, Taiwan.*

<sup>b</sup> *Building and Construction Techniques Engineering Department, Al-Mustaqbal University College, 51001 Hillah, Babylon, Iraq.*

<sup>c</sup> *College of Medical Technology/ Al-Farahidi University/ Iraq*

<sup>d</sup> *Al-Nisour University College/Baghdad/Iraq*

<sup>e</sup> *Department of Medical Laboratory Technics, AlNoor University College, Bartella, Iraq*

<sup>f</sup> *Hilla University college, Babylon, Iraq/ Department of Prosthetic Dental Technology/Iraq*

<sup>g</sup> *Refrigeration and Air-conditioning Technical Engineering Department, College of Technical Engineering, The Islamic University, Najaf, Iraq*

<sup>h</sup> *Mazaya University College/ Iraq*

<sup>i</sup> *Department of Clinical Laboratory Sciences, College of Applied Medical Sciences, King Khalid University, Abha, Saudi Arabia*

**\*Corresponding Authors:** Email: [drchouyihsu@gmail.com](mailto:drchouyihsu@gmail.com), [sahadrawi@gmail.com](mailto:sahadrawi@gmail.com)

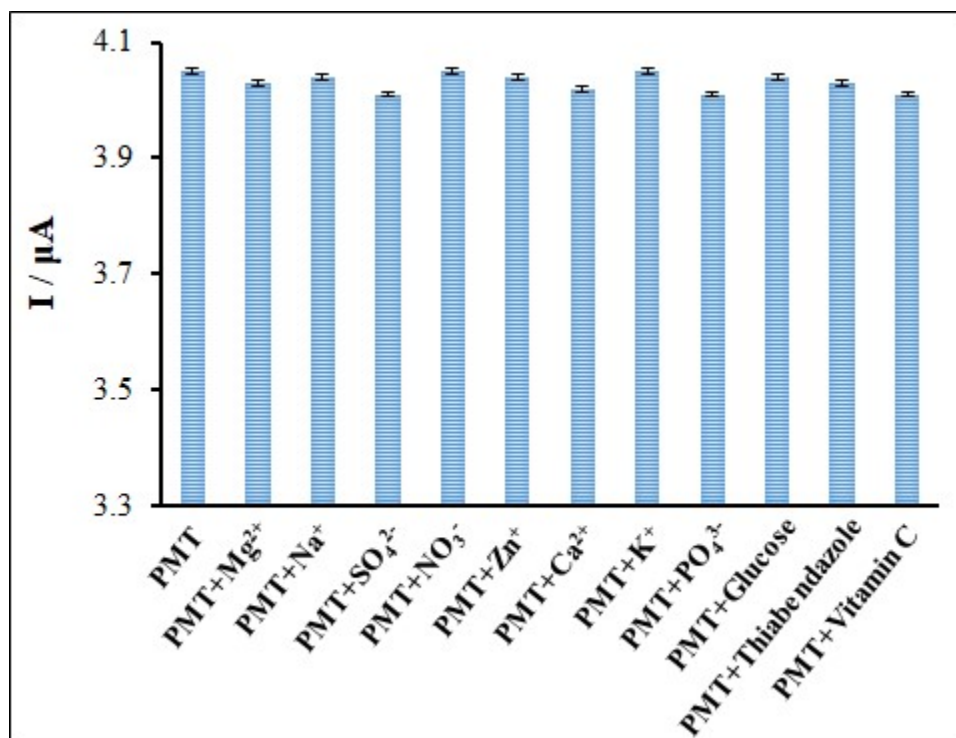

**Figure S1.** The oxidation current diagram of modified electrode in the presence of 50.0 μM PMT in PBS (0.1 M, pH 4) and other investigated interferences.

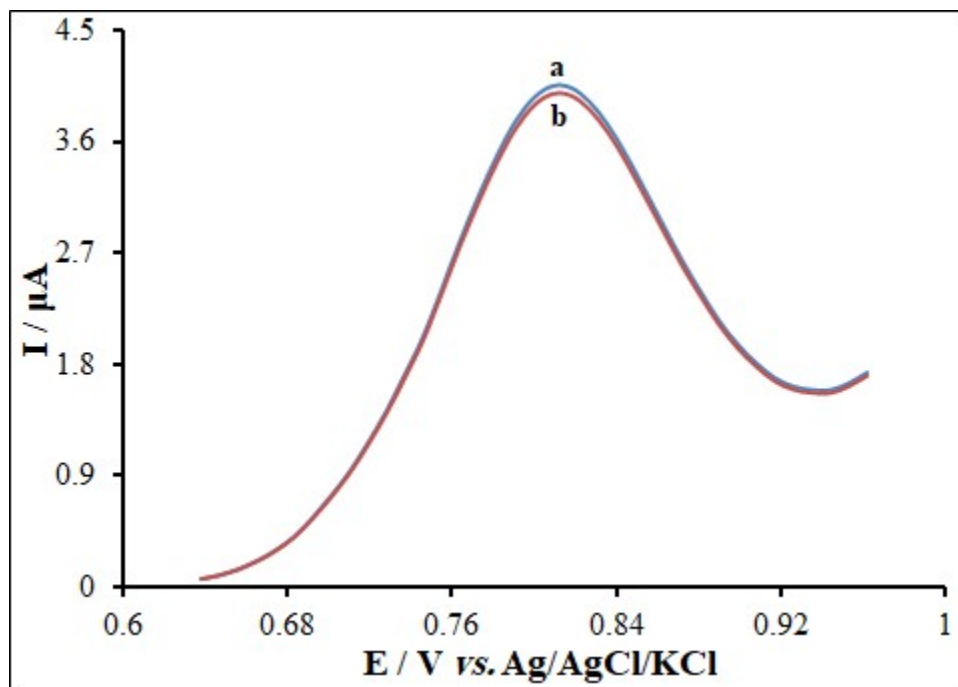

**Figure S2.** DPVs of modified electrode (a) (containing 20.0  $\mu\text{M}$  of PMT) and (b) after four weeks.

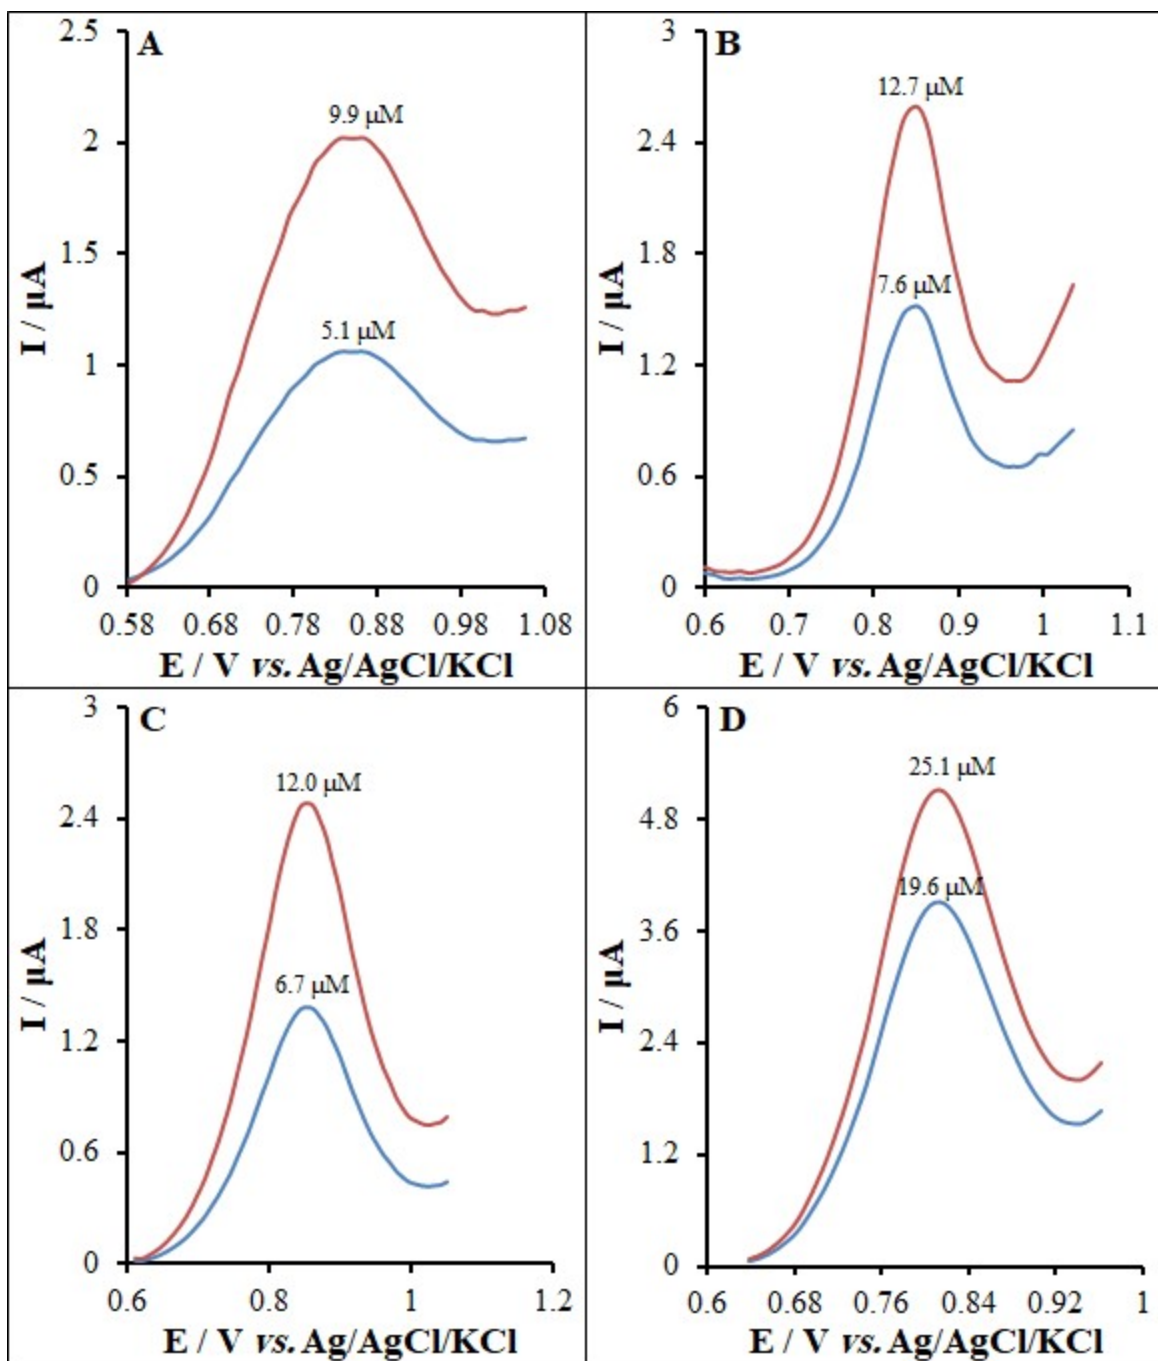

**Figure S3.** DPV results obtained for (A) apple, (B) orange, (C) strawberry and (D) water samples in presence of PMT at the electrode modified.
